# Supplementary material for: Effects of Thickness Fraction Process on Physicochemical Properties, Cooking Qualities, and Sensory Characteristics of Long-Grain Rice Samples
Source: MDPI journal article supplement (doi:10.3390/foods11020222), 2022-01-14
Supplement: s1 [file s1]

**Supplementary Table S1. Descriptors, definitions, and references for appearance, aroma/aromatics, and textural attributes of cooked rice used in the descriptive sensory analysis**

| Descriptors                | Definition                                                                                                                                               | References <sup>1</sup><br>(Intensity)                     |
|----------------------------|----------------------------------------------------------------------------------------------------------------------------------------------------------|------------------------------------------------------------|
| <b>Appearances</b>         |                                                                                                                                                          |                                                            |
| Degree of whiteness        | The degree to which the sample is pure white                                                                                                             | Ref. D (13.0)<br>Ref. C (6.0)                              |
| Grain size                 | The overall dimensions of the rice kernels in terms of width and length                                                                                  | Ref. D (7.5)                                               |
| <b>Aromas/Aromatics</b>    |                                                                                                                                                          |                                                            |
| Starchy                    | The aromatic associated with the starch of a particular grain source                                                                                     | UAS <sup>2</sup>                                           |
| Grainy                     | A general term used to describe the aromatics of raw or cooked grains, which cannot be tied to a specific grain type                                     | UAS                                                        |
| Cardboard/Papery           | The aromatic associated with early stages of oxidation                                                                                                   | UAS                                                        |
| Sweet aromatic             | The aromatic associated with materials that also have a sweet taste, such as molasses, caramelized sugars, cotton candy, maple syrup, or maltol          | UAS                                                        |
| Metallic                   | The aromatic associated with metals, tinny, or irony                                                                                                     | UAS                                                        |
| Burlap                     | The aromatic associated with burlap                                                                                                                      | UAS                                                        |
| Floral/Minty               | The aromatic associated with a non-specific floral note and sometimes described as minty                                                                 | UAS                                                        |
| <b>Basic tastes</b>        |                                                                                                                                                          |                                                            |
| Sweetness                  | The basic taste, perceived on the tongue, stimulated by sugars and high potency sweeteners (reference: sucrose solution)                                 | 2% (2.0)<br>5% (5.0)<br>10% (10.0)<br>16% (15.0)           |
| Sourness                   | The basic taste, perceived on the tongue, stimulated by acids such as citric acid (reference: citric acid solution)                                      | 0.05% (2.0)<br>0.08% (5.0)<br>0.15% (10.0)<br>0.20% (15.0) |
| Bitterness                 | The basic taste, perceived on the tongue, stimulated by substances such as quinine, caffeine, and certain other alkaloids (reference: caffeine solution) | 0.05% (2.0)<br>0.08% (5.0)<br>0.15% (10.0)<br>0.20% (15.0) |
| Saltiness                  | The basic taste, perceived on the tongue, stimulated by sodium salt, especially sodium chloride (reference: sodium chloride solution)                    | 0.2% (2.0)<br>0.5% (8.5)<br>0.7% (15.0)                    |
| <b>Textural attributes</b> |                                                                                                                                                          |                                                            |
| Manual stickiness          | The force required to separate the fingers after compressing the sample between the thumb and forefinger ("none" to "much sticky")                       | Ref. A (5.0)                                               |
| Initial cohesion           | The degree to which the un-chewed sample sticks together ("loose" to "tight")                                                                            | Ref. B (1.0)<br>Ref. A (3.0)<br>Ref. D (11.0)              |

|                         |                                                                                                                                 |                                                               |
|-------------------------|---------------------------------------------------------------------------------------------------------------------------------|---------------------------------------------------------------|
| Hardness                | The force required to compress the sample (“soft” to “hard”)                                                                    | Ref. D (1.0)<br>Ref. A (4.0)<br>Ref. B (5.0)<br>Ref. C (10.0) |
| Crunchy cores           | The amount of crunchy centers perceived in the sample while chewing the sample 4-5 times                                        | Ref. A (5.0)<br>Ref. C (12.0)                                 |
| Tooth pull              | The force required to separate the teeth during mastication by evaluating on the 3 <sup>rd</sup> pull (“none” to “much sticky”) | Ref. B (2.0)<br>Ref. A (4.0)                                  |
| Metallic feeling factor | The aromatics associated with metals, tinny or iron or a flat chemical feeling factor stimulated on the tongue by metal coins   | UAS                                                           |

<sup>1</sup>References A to D = 300 g of raw rice was cooked in an electronic rice cooker (RC3314W, Black & Decker, Beachwood, OH, USA) with a 1:3.5 rice-to-water mass ratio. Specifically, Reference A: Riceland Extra Long Grain Brown Rice (Riceland Foods, Stuttgart, AR, USA) cooked for 35 min; Reference B: Uncle Ben’s Converted Brown Rice (Mars Food, McLean, VA, USA) cooked for 25 min; Reference C: Riceland Extra Long Grain Brown Rice (Riceland Foods) cooked for 25 min; and Reference D: Riceland Extra Long Grain Milled Rice (Riceland Foods) cooked for 25 min. Each cooked-rice reference was held in the rice cooker for 5 min and then gently fluffed. Next, 30 g of the cooked rice was placed in a 118-mL glass bowl, covered with a glass lid, and served at approximately 71 °C.

<sup>2</sup>UAS: Universal Aromatic Scale with a modification; soda note in Nabisco Premium Original Saltine Crackers (Mondelez Global LLC, East Hanover, NJ, USA) = 3.0; cooked-apple note in Mott’s Natural Applesauce (Mott’s LLP, Plano, TX, USA) = 7.0.

**Supplementary Table S2. Mean values ( $\pm$  standard deviation) of the rice subsamples with respect to sensory attributes as a function of rice**

**cultivar and thickness fraction**

| Attributes                 | Total             |                   | XP760             |                   | XL753             |                   | V3501             |                   | Cheniere          |                   |
|----------------------------|-------------------|-------------------|-------------------|-------------------|-------------------|-------------------|-------------------|-------------------|-------------------|-------------------|
|                            | UNF               | FRA               |
| <b>Appearance</b>          |                   |                   |                   |                   |                   |                   |                   |                   |                   |                   |
| Degree of whiteness        | 12.5 ( $\pm$ 0.6) | 12.5 ( $\pm$ 0.6) | 12.3 ( $\pm$ 0.6) | 12.4 ( $\pm$ 0.6) | 12.4 ( $\pm$ 0.7) | 12.6 ( $\pm$ 0.6) | 12.5 ( $\pm$ 0.5) | 12.4 ( $\pm$ 0.7) | 12.6 ( $\pm$ 0.5) | 12.6 ( $\pm$ 0.7) |
| Grain size                 | 6.7 ( $\pm$ 0.7)  | 6.8 ( $\pm$ 0.7)  | 6.7 ( $\pm$ 0.6)  | 6.9 ( $\pm$ 0.6)  | 6.7 ( $\pm$ 0.7)  | 6.6 ( $\pm$ 0.8)  | 6.5 ( $\pm$ 0.6)  | 6.7 ( $\pm$ 0.7)  | 6.9 ( $\pm$ 0.6)  | 6.8 ( $\pm$ 0.8)  |
| <b>Aromas/Aromatics</b>    |                   |                   |                   |                   |                   |                   |                   |                   |                   |                   |
| Starchy                    | 5.4 ( $\pm$ 0.7)  | 5.3 ( $\pm$ 0.8)  | 5.5 ( $\pm$ 0.6)  | 5.4 ( $\pm$ 0.8)  | 5.4 ( $\pm$ 0.7)  | 5.3 ( $\pm$ 0.8)  | 5.3 ( $\pm$ 0.8)  | 5.3 ( $\pm$ 0.8)  | 5.2 ( $\pm$ 0.9)  | 5.2 ( $\pm$ 0.9)  |
| Grainy                     | 3.8 ( $\pm$ 0.8)  | 3.7 ( $\pm$ 1.0)  | 4.0 ( $\pm$ 0.6)  | 3.7 ( $\pm$ 1.1)  | 3.9 ( $\pm$ 0.6)  | 3.7 ( $\pm$ 1.1)  | 3.8 ( $\pm$ 0.7)  |
| Cardboard/<br>Papery       | 2.4 ( $\pm$ 1.4)  | 2.3 ( $\pm$ 1.5)  | 2.3 ( $\pm$ 1.6)  | 2.4 ( $\pm$ 1.5)  | 2.4 ( $\pm$ 1.4)  | 2.4 ( $\pm$ 1.5)  | 2.6 ( $\pm$ 1.3)  | 2.2 ( $\pm$ 1.6)  | 2.4 ( $\pm$ 1.5)  | 2.2 ( $\pm$ 1.6)  |
| Sweet                      | 0.1 ( $\pm$ 0.7)  | 0.0 ( $\pm$ 0.0)  | 0.2 ( $\pm$ 0.8)  | 0.0 ( $\pm$ 0.0)  | 0.2 ( $\pm$ 0.8)  | 0.0 ( $\pm$ 0.0)  | 0.0 ( $\pm$ 0.0)  | 0.0 ( $\pm$ 0.0)  | 0.2 ( $\pm$ 0.8)  | 0.0 ( $\pm$ 0.0)  |
| Metallic                   | 1.0 ( $\pm$ 1.5)  | 1.0 ( $\pm$ 1.6)  | 0.9 ( $\pm$ 1.6)  | 1.0 ( $\pm$ 1.6)  | 0.9 ( $\pm$ 1.6)  | 1.1 ( $\pm$ 1.7)  | 1.0 ( $\pm$ 1.6)  | 0.9 ( $\pm$ 1.6)  | 1.1 ( $\pm$ 1.6)  | 1.0 ( $\pm$ 1.6)  |
| Burlap                     | 1.3 ( $\pm$ 1.6)  | 1.4 ( $\pm$ 1.6)  | 1.2 ( $\pm$ 1.6)  | 1.4 ( $\pm$ 1.7)  | 1.5 ( $\pm$ 1.6)  | 1.3 ( $\pm$ 1.7)  | 1.3 ( $\pm$ 1.6)  | 1.3 ( $\pm$ 1.7)  | 1.1 ( $\pm$ 1.7)  | 1.5 ( $\pm$ 1.7)  |
| Floral/Minty               | 0.8 ( $\pm$ 1.4)  | 0.6 ( $\pm$ 1.2)  | 0.7 ( $\pm$ 1.4)  | 0.4 ( $\pm$ 1.0)  | 0.7 ( $\pm$ 1.4)  | 0.7 ( $\pm$ 1.4)  | 0.7 ( $\pm$ 1.4)  | 0.5 ( $\pm$ 1.3)  | 0.9 ( $\pm$ 1.5)  | 0.7 ( $\pm$ 1.4)  |
| <b>Basic tastes</b>        |                   |                   |                   |                   |                   |                   |                   |                   |                   |                   |
| Sweetness                  | 0.2 ( $\pm$ 0.3)  | 0.2 ( $\pm$ 0.2)  | 0.2 ( $\pm$ 0.3)  | 0.3 ( $\pm$ 0.3)  | 0.2 ( $\pm$ 0.3)  | 0.2 ( $\pm$ 0.3)  | 0.3 ( $\pm$ 0.3)  | 0.2 ( $\pm$ 0.3)  | 0.3 ( $\pm$ 0.4)  | 0.2 ( $\pm$ 0.3)  |
| Sourness                   | 0.4 ( $\pm$ 0.4)  | 0.4 ( $\pm$ 0.4)  | 0.4 ( $\pm$ 0.4)  | 0.4 ( $\pm$ 0.5)  | 0.4 ( $\pm$ 0.4)  | 0.4 ( $\pm$ 0.5)  | 0.5 ( $\pm$ 0.5)  | 0.4 ( $\pm$ 0.5)  | 0.4 ( $\pm$ 0.6)  | 0.4 ( $\pm$ 0.5)  |
| Bitterness                 | 0.2 ( $\pm$ 0.3)  | 0.2 ( $\pm$ 0.3)  | 0.3 ( $\pm$ 0.5)  | 0.2 ( $\pm$ 0.4)  | 0.2 ( $\pm$ 0.3)  | 0.3 ( $\pm$ 0.5)  | 0.2 ( $\pm$ 0.3)  | 0.3 ( $\pm$ 0.4)  | 0.3 ( $\pm$ 0.4)  | 0.3 ( $\pm$ 0.3)  |
| Saltiness                  | 0.1 ( $\pm$ 0.1)  | 0.1 ( $\pm$ 0.7)  | 0.1 ( $\pm$ 0.2)  | 0.4 ( $\pm$ 1.5)  |
| <b>Textural attributes</b> |                   |                   |                   |                   |                   |                   |                   |                   |                   |                   |
| Manual stickiness          | 6.3 ( $\pm$ 1.0)  | 6.2 ( $\pm$ 1.1)  | 6.3 ( $\pm$ 0.7)  | 6.2 ( $\pm$ 1.1)  | 6.4 ( $\pm$ 1.1)  | 6.0 ( $\pm$ 0.8)  | 6.1 ( $\pm$ 1.4)  | 6.0 ( $\pm$ 1.2)  | 6.3 ( $\pm$ 0.9)  | 6.4 ( $\pm$ 1.2)  |
| Initial cohesion           | 9.3 ( $\pm$ 2.4)  | 9.3 ( $\pm$ 2.4)  | 10.1 ( $\pm$ 1.8) | 9.4 ( $\pm$ 2.3)  | 9.1 ( $\pm$ 2.3)  | 9.4 ( $\pm$ 2.2)  | 8.9 ( $\pm$ 2.9)  | 9.3 ( $\pm$ 2.2)  | 9.1 ( $\pm$ 2.4)  | 9.0 ( $\pm$ 2.1)  |
| Hardness                   | 2.1 ( $\pm$ 0.8)  | 1.9 ( $\pm$ 0.7)  | 1.8 ( $\pm$ 0.5)  | 1.9 ( $\pm$ 0.7)  | 2.1 ( $\pm$ 0.8)  | 1.9 ( $\pm$ 0.6)  | 2.1 ( $\pm$ 0.8)  | 1.8 ( $\pm$ 0.6)  | 2.2 ( $\pm$ 1.0)  | 2.2 ( $\pm$ 0.9)  |
| Crunchy cores              | 1.4 ( $\pm$ 1.2)  | 1.3 ( $\pm$ 1.2)  | 1.3 ( $\pm$ 1.0)  | 1.3 ( $\pm$ 1.3)  | 1.5 ( $\pm$ 1.3)  | 1.4 ( $\pm$ 1.3)  | 1.3 ( $\pm$ 1.2)  | 1.1 ( $\pm$ 1.2)  | 1.6 ( $\pm$ 1.2)  | 1.4 ( $\pm$ 1.1)  |
| Tooth pull                 | 3.5 ( $\pm$ 0.9)  | 3.6 ( $\pm$ 0.9)  | 3.4 ( $\pm$ 0.9)  | 3.7 ( $\pm$ 0.8)  | 3.5 ( $\pm$ 0.9)  | 3.5 ( $\pm$ 1.0)  | 3.4 ( $\pm$ 0.9)  | 3.6 ( $\pm$ 1.0)  | 3.7 ( $\pm$ 0.8)  | 3.7 ( $\pm$ 0.9)  |

|                               |                  |                  |                 |                 |                 |                 |                 |                 |                 |                 |
|-------------------------------|------------------|------------------|-----------------|-----------------|-----------------|-----------------|-----------------|-----------------|-----------------|-----------------|
| Metallic<br>feeling<br>factor | 1.9 ( $\pm$ 2.3) | 2.0 ( $\pm$ 2.4) | 1.9 $\pm$ (2.4) | 2.0 $\pm$ (2.5) | 1.9 $\pm$ (2.2) | 2.1 $\pm$ (2.5) | 2.3 $\pm$ (2.7) | 2.1 $\pm$ (2.6) | 1.9 $\pm$ (2.3) | 2.1 $\pm$ (2.6) |
|-------------------------------|------------------|------------------|-----------------|-----------------|-----------------|-----------------|-----------------|-----------------|-----------------|-----------------|

---

UNF and FRA represent unfractionated and fractionated rice samples, respectively.
